# Supplementary material for: Predictive value of clinician impression for readmission and postdischarge mortality among neonates and young children in Dar es Salaam, Tanzania and Monrovia, Liberia
Source: PubMed Central journal article supplement — BMJ Paediatr Open. 2023 Jun 29;7(1):e001972. doi: 10.1136/bmjpo-2023-001972 (PMC10314694; doi:10.1136/bmjpo-2023-001972), 2023-06-29
Supplement: bmjpo-2023-001972supp001.pdf [file bmjpo-2023-001972supp001.pdf]

**Appendix Survey.** Survey that clinicians filled out near the time of discharge for each enrolled neonate or young child in Dar es Salaam, Tanzania and Monrovia, Liberia

### Provider Discharge Survey

Date of Data Collection \_\_\_\_\_  
DD/MM/YYYY

Patient's FIRST name \_\_\_\_\_

Patient's LAST name \_\_\_\_\_

Patient's SEX:

- Male
- Female

Participant's Hospital Identifier (Unique number assigned to each patient) \_\_\_\_\_

Discharging provider year of training:

- Intern
- First year resident
- Second year resident
- Third year resident
- Specialist
- Consultant
- Medical officer
- Other. Please describe. \_\_\_\_\_

In your estimation, is the patient who was discharged at risk of any of the following?

- Re-admission to the hospital within 60 days
- Death in the next 60 days
- None of the above

If yes to any of the above, how likely is that outcome?

- 0%
- 1-5%
- 6-20%
- 21-40%
- 41-60%
- 61-80%
- 81-99%
- 100%

If yes, why do you think the patient is at risk of any of the above outcomes?

- Progression of illness
- Social concerns
- Inability to pay for future medical
- Other. Please describe. \_\_\_\_\_
