# Supplementary material for: Predictive value of clinician impression for readmission and postdischarge mortality among neonates and young children in Dar es Salaam, Tanzania and Monrovia, Liberia
Source: PubMed Central journal article supplement — BMJ Paediatr Open. 2023 Jun 29;7(1):e001972. doi: 10.1136/bmjpo-2023-001972 (PMC10314694; doi:10.1136/bmjpo-2023-001972), 2023-06-29
Supplement: bmjpo-2023-001972supp002.pdf [file bmjpo-2023-001972supp002.pdf]

**Supplemental Table 1.** Test characteristics for clinician predicted probability of all-cause, 60-day hospital readmission for neonates at both sites

| Threshold %                     | Sensitivity (95% CI) | Specificity (95% CI) | Positive Predictive Value (95% CI) | Negative Predictive Value (95% CI) | Area under Precision-Recall Curve (95% CI) |
|---------------------------------|----------------------|----------------------|------------------------------------|------------------------------------|--------------------------------------------|
| All Clinicians (N=2,173)        |                      |                      |                                    |                                    | 0.03 (0.02, 0.04),<br>chance=0.04          |
| ≤5                              | 8.75 (3.75, 15)      | 73.77 (71.91, 75.68) | 1.25 (0.51, 2.19)                  | 95.48 (95.19, 95.81)               |                                            |
| ≤20                             | 8.75 (3.75, 15)      | 73.87 (72, 75.73)    | 1.25 (0.51, 2.19)                  | 95.48 (95.19, 95.81)               |                                            |
| ≤40                             | 8.75 (3.75, 15)      | 74.34 (72.48, 76.21) | 1.28 (0.52, 2.23)                  | 95.51 (95.23, 95.84)               |                                            |
| ≤60                             | 7.5 (2.5, 13.75)     | 74.58 (72.72, 76.4)  | 1.1 (0.36, 2.04)                   | 95.46 (95.2, 95.78)                |                                            |
| ≤80                             | 2.5 (0, 6.25)        | 94.84 (93.88, 95.8)  | 1.75 (0, 4.47)                     | 96.21 (96.11, 96.36)               |                                            |
| ≤99                             | 0 (0, 0)             | 100 (100, 100)       | NA (NA, NA)                        | 96.32 (96.32, 96.32)               |                                            |
| Interns/Residents (N=2,076)     |                      |                      |                                    |                                    | 0.03 (0.02, 0.04),<br>chance=0.04          |
| ≤5                              | 7.79 (2.6, 14.29)    | 73.69 (71.68, 75.54) | 1.12 (0.37, 2.03)                  | 95.39 (95.11, 95.72)               |                                            |
| ≤20                             | 7.79 (2.6, 14.29)    | 73.74 (71.74, 75.59) | 1.12 (0.37, 2.04)                  | 95.4 (95.12, 95.73)                |                                            |
| ≤40                             | 7.79 (2.6, 14.29)    | 74.09 (72.09, 75.94) | 1.14 (0.37, 2.07)                  | 95.42 (95.14, 95.74)               |                                            |
| ≤60                             | 7.79 (2.6, 14.29)    | 74.29 (72.34, 76.14) | 1.15 (0.38, 2.08)                  | 95.43 (95.15, 95.76)               |                                            |
| ≤80                             | 2.6 (0, 6.49)        | 95.15 (94.15, 96.05) | 1.96 (0, 4.85)                     | 96.2 (96.09, 96.35)                |                                            |
| ≤99                             | 0 (0, 0)             | 100 (100, 100)       | NA (NA, NA)                        | 96.29 (96.29, 96.29)               |                                            |
| Specialist or Consultant (N=66) |                      |                      |                                    |                                    | 0.09 (0.01, 0.18) ,<br>chance=0.07         |
| ≤5                              | 50 (0, 100)          | 65.62 (53.12, 76.56) | 4.35 (0, 10.53)                    | 97.67 (94.87, 100)                 |                                            |
| ≤20                             | 50 (0, 100)          | 67.19 (54.69, 79.69) | 4.55 (0, 11.11)                    | 97.73 (95.12, 100)                 |                                            |
| ≤40                             | 50 (0, 100)          | 71.88 (60.94, 82.81) | 5.26 (0, 12.5)                     | 97.87 (95.45, 100)                 |                                            |
| ≤60                             | 0 (0, 0)             | 73.44 (62.5, 84.38)  | 0 (0, 0)                           | 95.92 (95.24, 96.43)               |                                            |
| ≤80                             | 0 (0, 0)             | 82.81 (73.44, 92.19) | 0 (0, 0)                           | 96.36 (95.92, 96.72)               |                                            |
| ≤99                             | 0 (0, 0)             | 100 (100, 100)       | NA (NA, NA)                        | 96.97 (96.97, 96.97)               |                                            |
| Medical Officer (N=30)          |                      |                      |                                    |                                    | 0.03 (NA, NA),<br>chance=0.04              |
| ≤5                              | 0 (0, 0)             | 100 (100, 100)       | NA (NA, NA)                        | 96.67 (96.67, 96.67)               |                                            |
| ≤20                             | 0 (0, 0)             | 100 (100, 100)       | NA (NA, NA)                        | 96.67 (96.67, 96.67)               |                                            |
| ≤40                             | 0 (0, 0)             | 100 (100, 100)       | NA (NA, NA)                        | 96.67 (96.67, 96.67)               |                                            |
| ≤60                             | 0 (0, 0)             | 100 (100, 100)       | NA (NA, NA)                        | 96.67 (96.67, 96.67)               |                                            |
| ≤80                             | 0 (0, 0)             | 100 (100, 100)       | NA (NA, NA)                        | 96.67 (96.67, 96.67)               |                                            |
| ≤99                             | 0 (0, 0)             | 100 (100, 100)       | NA (NA, NA)                        | 96.67 (96.67, 96.67)               |                                            |

**Supplemental Table 2.** Test characteristics for clinician predicted probability of all-cause, 60-day hospital readmission for young children aged 1-59 months at both sites

| Threshold %                      | Sensitivity (95% CI) | Specificity (95% CI) | Positive Predictive Value (95% CI) | Negative Predictive Value (95% CI) | Area under Precision-Recall Curve (95% CI) |
|----------------------------------|----------------------|----------------------|------------------------------------|------------------------------------|--------------------------------------------|
| All Clinicians (N=1,722)         |                      |                      |                                    |                                    | 0.09 (0.04, 0.14),<br>chance=0.06          |
| ≤5                               | 27.1 (18.69, 35.51)  | 70.77 (68.54, 73)    | 5.77 (4.09, 7.57)                  | 93.6 (92.9, 94.33)                 |                                            |
| ≤20                              | 27.1 (18.69, 35.51)  | 71.21 (68.98, 73.44) | 5.85 (4.14, 7.69)                  | 93.64 (92.95, 94.36)               |                                            |
| ≤40                              | 24.3 (15.89, 32.71)  | 72.76 (70.65, 74.86) | 5.51 (3.81, 7.4)                   | 93.53 (92.9, 94.23)                |                                            |
| ≤60                              | 22.43 (14.95, 30.84) | 73.87 (71.7, 75.98)  | 5.34 (3.59, 7.35)                  | 93.48 (92.88, 94.19)               |                                            |
| ≤80                              | 11.21 (5.61, 17.76)  | 92.26 (90.84, 93.44) | 8.63 (4.32, 13.71)                 | 94 (93.63, 94.45)                  |                                            |
| ≤99                              | 3.74 (0.93, 7.48)    | 99.57 (99.26, 99.88) | 35.71 (10, 66.67)                  | 93.98 (93.81, 94.21)               |                                            |
| Interns/Residents (N=1,426)      |                      |                      |                                    |                                    | 0.08 (0.04, 0.11),<br>chance=0.06          |
| ≤5                               | 21.43 (13.1, 30.95)  | 70.57 (68.18, 73.03) | 4.32 (2.7, 6.11)                   | 93.47 (92.81, 94.2)                |                                            |
| ≤20                              | 21.43 (13.1, 30.95)  | 70.72 (68.33, 73.1)  | 4.35 (2.71, 6.13)                  | 93.48 (92.82, 94.22)               |                                            |
| ≤40                              | 21.43 (13.1, 30.95)  | 71.83 (69.45, 74.14) | 4.51 (2.81, 6.35)                  | 93.58 (92.93, 94.29)               |                                            |
| ≤60                              | 19.05 (10.71, 27.38) | 72.35 (69.97, 74.67) | 4.08 (2.45, 5.93)                  | 93.43 (92.83, 94.12)               |                                            |
| ≤80                              | 8.33 (3.57, 14.29)   | 92.55 (91.06, 93.96) | 6.25 (2.48, 11.2)                  | 94.14 (93.83, 94.54)               |                                            |
| ≤99                              | 2.38 (0, 5.95)       | 99.78 (99.48, 100)   | 40 (0, 100)                        | 94.23 (94.09, 94.43)               |                                            |
| Specialist or Consultant (N=109) |                      |                      |                                    |                                    | 0.05 (0.02, 0.08),<br>chance=0.06          |
| ≤5                               | 0 (0, 0)             | 71.43 (62.86, 80)    | 0 (0, 0)                           | 94.94 (94.29, 95.45)               |                                            |
| ≤20                              | 0 (0, 0)             | 71.43 (62.86, 80)    | 0 (0, 0)                           | 94.94 (94.29, 95.45)               |                                            |
| ≤40                              | 0 (0, 0)             | 74.29 (65.71, 82.86) | 0 (0, 0)                           | 95.12 (94.52, 95.6)                |                                            |
| ≤60                              | 0 (0, 0)             | 76.19 (67.62, 83.81) | 0 (0, 0)                           | 95.24 (94.67, 95.65)               |                                            |
| ≤80                              | 0 (0, 0)             | 86.67 (79.98, 92.38) | 0 (0, 0)                           | 95.79 (95.45, 96.04)               |                                            |
| ≤99                              | 0 (0, 0)             | 100 (100, 100)       | NA (NA, NA)                        | 96.33 (96.33, 96.33)               |                                            |
| Medical Officer (N=187)          |                      |                      |                                    |                                    | 0.30 (0.18, 0.41),<br>chance=0.10          |
| ≤5                               | 57.89 (36.84, 78.95) | 72.02 (64.88, 79.17) | 19.2 (12.07, 26.32)                | 93.85 (90.76, 96.85)               |                                            |
| ≤20                              | 57.89 (36.84, 78.95) | 75 (67.86, 81.55)    | 20.93 (13.46, 28.85)               | 94.07 (91.11, 96.95)               |                                            |
| ≤40                              | 42.11 (21.05, 63.16) | 79.17 (72.62, 85.12) | 18.75 (9.37, 28.57)                | 92.36 (89.61, 95.17)               |                                            |
| ≤60                              | 42.11 (21.05, 63.16) | 84.52 (78.57, 89.88) | 23.68 (12.12, 36)                  | 92.86 (90.26, 95.42)               |                                            |
| ≤80                              | 26.32 (10.53, 47.37) | 92.86 (88.69, 96.43) | 30 (10.53, 50)                     | 91.76 (89.88, 93.98)               |                                            |
| ≤99                              | 10.53 (0, 26.32)     | 97.62 (95.24, 99.4)  | 33.33 (0, 80)                      | 90.61 (89.56, 92.18)               |                                            |

**Supplemental Table 3.** Test characteristics for clinician predicted probability of all-cause, 60-day hospital readmission among all participants by time to unplanned hospital readmission

| Threshold % | Sensitivity (95% CI) | Specificity (95% CI) | Positive Predictive Value (95% CI) | Negative Predictive Value (95% CI) | Area under Precision-Recall Curve (95% CI) |
|-------------|----------------------|----------------------|------------------------------------|------------------------------------|--------------------------------------------|
| Day 7       |                      |                      |                                    |                                    | 0.03 (0.01, 0.05),<br>chance=0.01          |
| ≤5          | 23.4 (10.64, 36.17)  | 72.77 (71.34, 74.22) | 1.03 (0.49, 1.62)                  | 98.72 (98.54, 98.95)               |                                            |
| ≤20         | 23.4 (10.64, 36.17)  | 73 (71.57, 74.45)    | 1.04 (0.5, 1.64)                   | 98.73 (98.54, 98.95)               |                                            |
| ≤40         | 23.4 (10.64, 36.17)  | 74.01 (72.61, 75.39) | 1.08 (0.51, 1.7)                   | 98.75 (98.56, 98.96)               |                                            |
| ≤60         | 23.4 (10.64, 36.17)  | 74.66 (73.28, 76.09) | 1.1 (0.53, 1.74)                   | 98.76 (98.57, 98.97)               |                                            |
| ≤80         | 12.77 (4.26, 23.4)   | 93.69 (92.96, 94.49) | 2.38 (0.78, 4.35)                  | 98.87 (98.76, 99.01)               |                                            |
| ≤99         | 4.26 (0, 10.64)      | 99.77 (99.58, 99.9)  | 16.67 (0, 46.15)                   | 98.84 (98.79, 98.92)               |                                            |
| Day 14      |                      |                      |                                    |                                    | 0.03 (0.02, 0.04),<br>chance=0.02          |
| ≤5          | 17.28 (9.88, 25.93)  | 72.68 (71.24, 74.07) | 1.31 (0.75, 1.95)                  | 97.63 (97.43, 97.87)               |                                            |
| ≤20         | 17.28 (9.88, 25.93)  | 72.92 (71.47, 74.28) | 1.32 (0.75, 1.97)                  | 97.64 (97.43, 97.88)               |                                            |
| ≤40         | 16.05 (8.64, 23.46)  | 73.89 (72.47, 75.25) | 1.28 (0.69, 1.89)                  | 97.64 (97.43, 97.86)               |                                            |
| ≤60         | 16.05 (8.64, 23.46)  | 74.57 (73.13, 75.91) | 1.31 (0.71, 1.94)                  | 97.66 (97.46, 97.88)               |                                            |
| ≤80         | 7.41 (2.47, 13.58)   | 93.68 (92.87, 94.47) | 2.38 (0.8, 4.43)                   | 97.94 (97.83, 98.08)               |                                            |
| ≤99         | 2.47 (0, 6.17)       | 99.76 (99.61, 99.9)  | 16.67 (0, 44.44)                   | 97.97 (97.91, 98.04)               |                                            |
| Day 30      |                      |                      |                                    |                                    | 0.03 (0.01, 0.06),<br>chance=0.03          |
| ≤5          | 18.64 (11.86, 25.42) | 72.57 (71.06, 73.95) | 2.06 (1.34, 2.87)                  | 96.61 (96.34, 96.91)               |                                            |
| ≤20         | 18.64 (11.86, 25.42) | 72.82 (71.33, 74.21) | 2.08 (1.35, 2.9)                   | 96.62 (96.35, 96.92)               |                                            |
| ≤40         | 16.95 (10.17, 23.73) | 73.79 (72.31, 75.17) | 1.97 (1.23, 2.74)                  | 96.6 (96.33, 96.87)                |                                            |
| ≤60         | 15.25 (9.32, 22.03)  | 74.42 (72.97, 75.8)  | 1.81 (1.1, 2.62)                   | 96.56 (96.31, 96.83)               |                                            |
| ≤80         | 6.78 (2.54, 11.86)   | 93.65 (92.82, 94.39) | 3.15 (1.24, 5.53)                  | 96.98 (96.85, 97.14)               |                                            |
| ≤99         | 1.69 (0, 4.24)       | 99.76 (99.6, 99.89)  | 16.67 (0, 44.44)                   | 97.01 (96.96, 97.09)               |                                            |
| Day 45      |                      |                      |                                    |                                    | 0.05 (0.04, 0.06),<br>chance=0.04          |
| ≤5          | 18.67 (12.67, 24.67) | 72.52 (71.13, 73.91) | 2.64 (1.84, 3.51)                  | 95.7 (95.39, 96.02)                |                                            |
| ≤20         | 18.67 (12.67, 24.67) | 72.76 (71.35, 74.15) | 2.66 (1.85, 3.54)                  | 95.71 (95.41, 96.03)               |                                            |
| ≤40         | 16.67 (11.33, 22.67) | 73.72 (72.26, 75.09) | 2.47 (1.69, 3.33)                  | 95.66 (95.38, 95.97)               |                                            |
| ≤60         | 15.33 (10, 21.33)    | 74.34 (72.92, 75.73) | 2.33 (1.56, 3.19)                  | 95.63 (95.37, 95.92)               |                                            |
| ≤80         | 7.33 (3.33, 11.33)   | 93.67 (92.87, 94.45) | 4.4 (2.21, 7.17)                   | 96.19 (96.04, 96.37)               |                                            |
| ≤99         | 2.67 (0.67, 5.35)    | 99.81 (99.68, 99.95) | 35.71 (9.09, 66.67)                | 96.24 (96.16, 96.35)               |                                            |

**Supplemental Table 4.** Test characteristics for clinician predicted probability of all-cause, 60-day post-discharge mortality among all patients by time to post-discharge mortality

| Threshold % | Sensitivity (95% CI) | Specificity (95% CI) | Positive Predictive Value (95% CI) | Negative Predictive Value (95% CI) | Area under Precision-Recall Curve (95% CI) |
|-------------|----------------------|----------------------|------------------------------------|------------------------------------|--------------------------------------------|
| Day 7       |                      |                      |                                    |                                    | 0.02 (0.001, 0.03),<br>chance=0.004        |
| ≤5          | 17.65 (0, 35.29)     | 96.21 (95.59, 96.78) | 1.97 (0, 4.29)                     | 99.63 (99.55, 99.71)               |                                            |
| ≤20         | 17.65 (0, 35.29)     | 96.47 (95.88, 97.01) | 2.11 (0, 4.58)                     | 99.63 (99.55, 99.71)               |                                            |
| ≤40         | 17.65 (0, 35.29)     | 96.7 (96.13, 97.24)  | 2.26 (0, 4.92)                     | 99.63 (99.55, 99.71)               |                                            |
| ≤60         | 17.65 (0, 35.29)     | 97.04 (96.49, 97.55) | 2.52 (0, 5.5)                      | 99.63 (99.55, 99.71)               |                                            |
| ≤80         | 5.88 (0, 17.65)      | 99.43 (99.2, 99.66)  | 4.17 (0, 14.29)                    | 99.59 (99.56, 99.64)               |                                            |
| ≤99         | 0 (0, 0)             | 99.95 (99.87, 100)   | 0 (0, 0)                           | 99.56 (99.56, 99.56)               |                                            |
| Day 14      |                      |                      |                                    |                                    | 0.02 (0.005, 0.03),<br>chance=0.01         |
| ≤5          | 13.16 (2.63, 23.68)  | 96.24 (95.62, 96.81) | 3.23 (0.7, 6.3)                    | 99.12 (99.01, 99.23)               |                                            |
| ≤20         | 13.16 (2.63, 23.68)  | 96.5 (95.93, 97.05)  | 3.45 (0.75, 6.78)                  | 99.12 (99.02, 99.23)               |                                            |
| ≤40         | 13.16 (2.63, 23.68)  | 96.73 (96.16, 97.25) | 3.7 (0.81, 7.26)                   | 99.12 (99.02, 99.23)               |                                            |
| ≤60         | 7.89 (0, 18.42)      | 97.02 (96.47, 97.54) | 2.42 (0, 5.51)                     | 99.07 (99, 99.17)                  |                                            |
| ≤80         | 2.63 (0, 7.89)       | 99.43 (99.2, 99.66)  | 4 (0, 14.29)                       | 99.04 (99.02, 99.1)                |                                            |
| ≤99         | 0 (0, 0)             | 99.95 (99.87, 100)   | 0 (0, 0)                           | 99.02 (99.02, 99.02)               |                                            |
| Day 30      |                      |                      |                                    |                                    | 0.04 (0.01, 0.07),<br>chance=0.02          |
| ≤5          | 9.52 (3.17, 17.46)   | 96.24 (95.64, 96.82) | 3.95 (1.29, 7.24)                  | 98.48 (98.37, 98.61)               |                                            |
| ≤20         | 9.52 (3.17, 17.46)   | 96.5 (95.9, 97.08)   | 4.23 (1.39, 7.76)                  | 98.48 (98.37, 98.61)               |                                            |
| ≤40         | 9.52 (3.17, 17.46)   | 96.74 (96.16, 97.29) | 4.51 (1.48, 8.33)                  | 98.49 (98.38, 98.62)               |                                            |
| ≤60         | 6.35 (1.59, 12.7)    | 97.03 (96.45, 97.55) | 3.28 (0.79, 6.96)                  | 98.44 (98.36, 98.55)               |                                            |
| ≤80         | 3.17 (0, 7.94)       | 99.45 (99.22, 99.69) | 8.33 (0, 21.74)                    | 98.42 (98.37, 98.5)                |                                            |
| ≤99         | 1.59 (0, 4.76)       | 99.97 (99.92, 100)   | 50 (0, 100)                        | 98.41 (98.38, 98.46)               |                                            |
| Day 45      |                      |                      |                                    |                                    | 0.04 (0.02, 0.06),<br>chance=0.02          |
| ≤5          | 8.6 (3.23, 13.98)    | 96.27 (95.66, 96.87) | 5.26 (2.17, 8.86)                  | 97.73 (97.61, 97.87)               |                                            |
| ≤20         | 8.6 (3.23, 13.98)    | 96.53 (95.9, 97.11)  | 5.63 (2.36, 9.45)                  | 97.74 (97.61, 97.87)               |                                            |
| ≤40         | 8.6 (3.23, 13.98)    | 96.77 (96.13, 97.32) | 6.02 (2.5, 10.17)                  | 97.74 (97.62, 97.88)               |                                            |
| ≤60         | 6.45 (2.15, 11.83)   | 97.05 (96.48, 97.56) | 4.96 (1.64, 9.26)                  | 97.69 (97.59, 97.83)               |                                            |
| ≤80         | 2.15 (0, 5.38)       | 99.45 (99.21, 99.66) | 8.33 (0, 22.22)                    | 97.65 (97.6, 97.73)                |                                            |
| ≤99         | 1.08 (0, 3.23)       | 99.97 (99.92, 100)   | 50 (0, 100)                        | 97.64 (97.61, 97.69)               |                                            |
